# Supplementary material for: Healthcare Professionals’ Learning from Patients as Teachers in Spiritual Care: A Grounded Theory Study in Taiwan
Source: Research Square preprint supplement (doi:10.21203/rs.3.rs-7636390/v1), 2025-11-11
Supplement: Supplementary file 1 [file 968dbeb8adb5191b8e727a63.docx]

**Appendix 1：Interview guide**

【Focus Group Interview Guide – Healthcare Professionals】

Purpose:

This study aims to understand the perspectives and practical experiences of healthcare professionals in the field of spiritual care, providing insights for the development of spiritual care competence and educational courses.

Interview Questions:

*1. Understanding of Spiritual Health and Distress*

- What does spiritual health mean to you?
- Do you think spiritual health is important? Why or why not?
- In your opinion, what does spiritual health mean for patients? Is it essential to address this issue? Why?
- Based on your experience, what are the potential consequences for patients with spiritual distress? How might it affect them?

*2. Experiences and Strategies in Caring for Spiritual Distress*

- Can you share your experiences caring for patients with spiritual distress? (e.g., How did you identify the issue? How did you build relationships with the patient? What strategies did you use? What changes or feedback did the patient show? Please describe the process.)

*3. Challenges and Facilitators in Providing Spiritual Care*

- What challenges do you think healthcare professionals face when caring for patients with spiritual distress? (e.g., If it was a challenge, what did you do? How did you feel? Please describe the process.)
- What key competencies do healthcare professionals need in providing spiritual care?
- What are the educational needs for improving spiritual care competencies?

*4. Personal and Professional Reflections*

- Is there a connection between healthcare professionals’ spiritual health and patients’ spiritual health? Why or why not?
- What are your personal and professional reflections on your caring experiences?

Note:

- Please include basic demographic information (e.g., age, gender, background) when sharing case experiences.
- Each participant is encouraged to share their thoughts within 2–3 minutes per question.
